# Supplementary material
Source: publisher site journal article supplement (https://www.dovepress.com/article/400614)
Supplement: Supplementary file 1 [file get_supplementary_file.php]

**Follow-up questionnaire regarding sociodemographic and further patient characteristics sent 28 days after the first finasteride prescription**

1. How did you find out about Myspring?

- Google
- TV
- Articles
- Social media
- Recommendation of a friend/colleague

2. What have you also done so far to inform yourself about hair loss?

- Conducted online research
- Read magazines and journals
- Talked to friends about it
- Other

3. Why did you choose telemedical care on Myspring?

- Doctor visit was not helpful
- Convenience
- Shame
- Discretion
- Trusted pharmacy
- Reasonable medication price
- Reasonable treatment fee
- Product selection
- Effective treatment
- Other

4. Which relationship status best describes your current situation?

- Married
- Relationship
- Single
- Other

5. What sexual orientation best describes you?

- Homosexual
- Heterosexual
- Bisexual
- Other

6. What is your highest level of education?

- Elementary school
- Secondary school
- A-level
- University degree

7. Which best describes your employment status?

- Full time
- Part time
- Student
- Vocational training
- Unemployed

8. What is your monthly net total household income (in euros)?

- <1,000
- 1,001 – 2,000
- 2,001 – 3,000
- 3,001 – 5,000
- >5,000

9. Did you, your parents, or your grandparents immigrate to Germany within the last decades?

- Yes
- No
